# Supplementary material
Source: PubMed Central journal article supplement (PMC1941795)

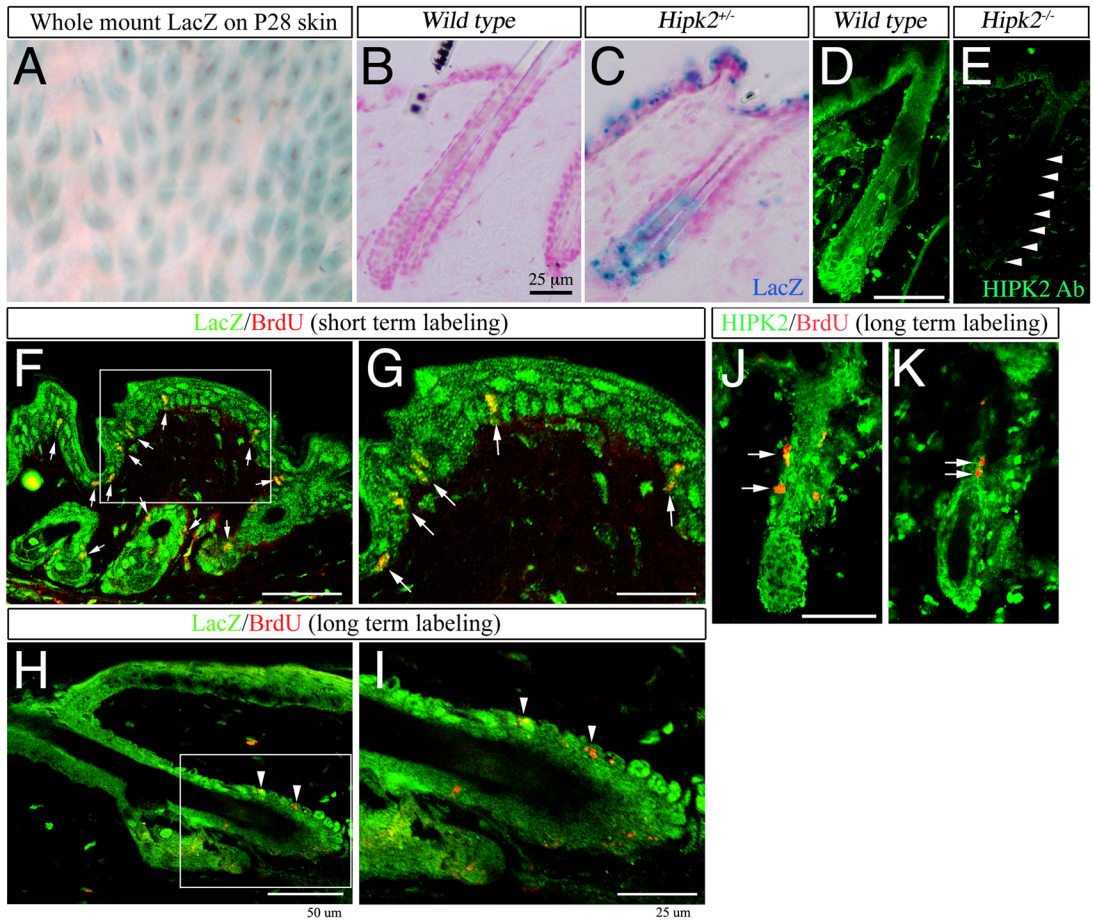

Supplement: pnas_0703213104_1.pdf [file pnas_0703213104_1.pdf]

**A**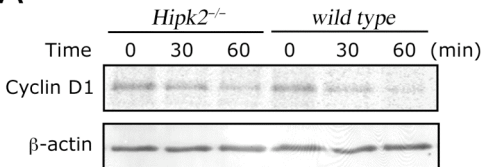**B**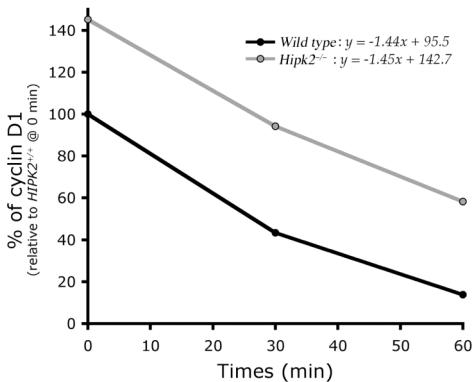

Supplement: pnas_0703213104_2.pdf [file pnas_0703213104_2.pdf]

A

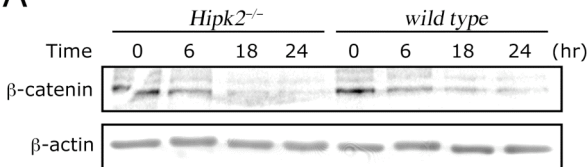

B

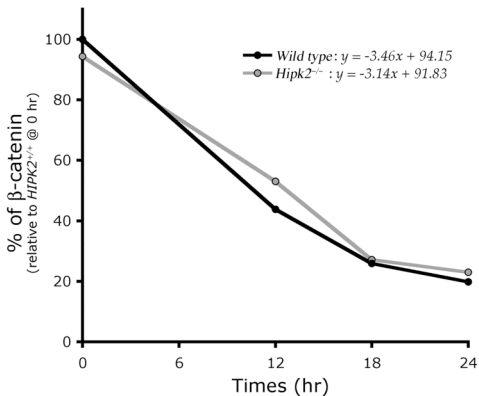

Supplement: pnas_0703213104_3.pdf [file pnas_0703213104_3.pdf]

**A**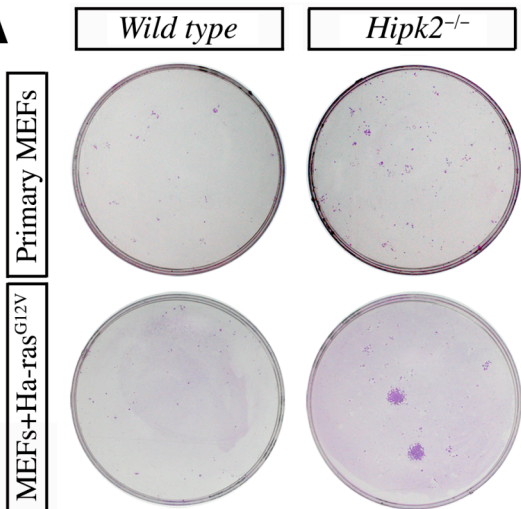**B**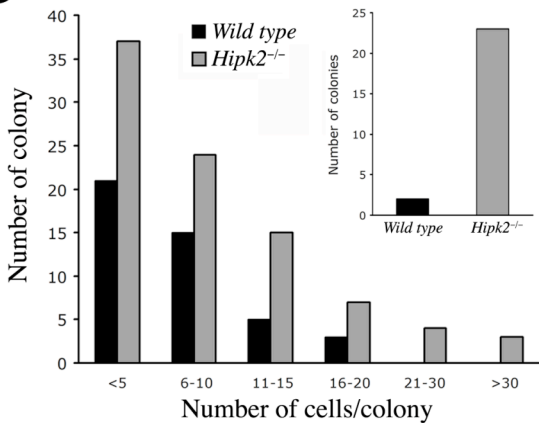

Supplement: pnas_0703213104_4.pdf [file pnas_0703213104_4.pdf]

**A**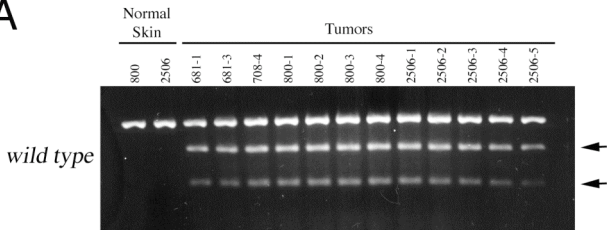**B**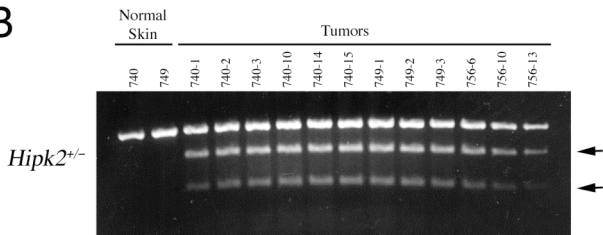**C**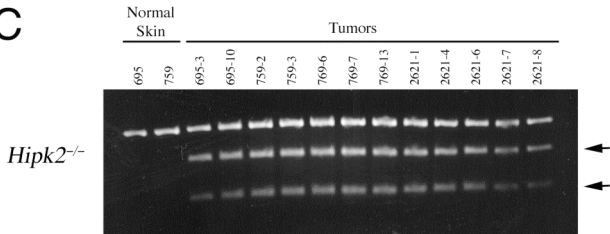

Supplement: pnas_0703213104_5.pdf [file pnas_0703213104_5.pdf]

**A**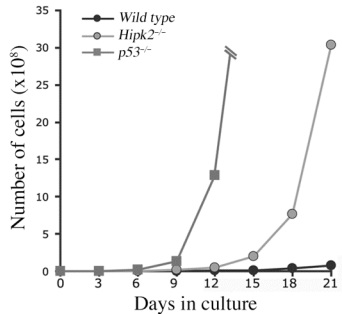**B**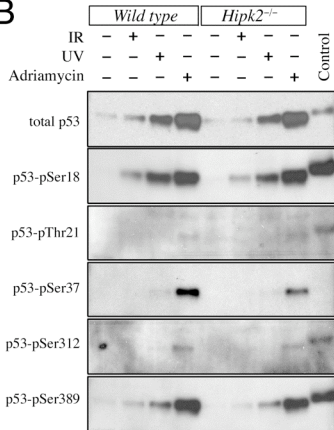**C**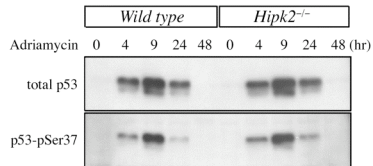**D**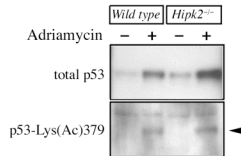

Supplement: pnas_0703213104_6.pdf [file pnas_0703213104_6.pdf]

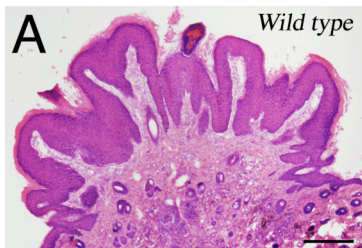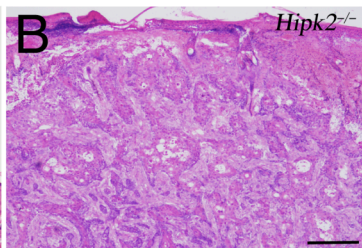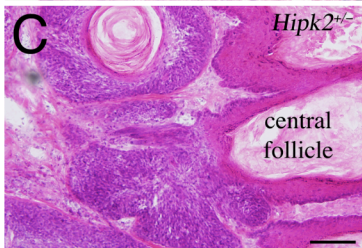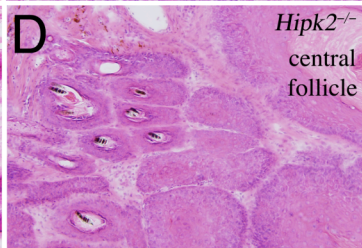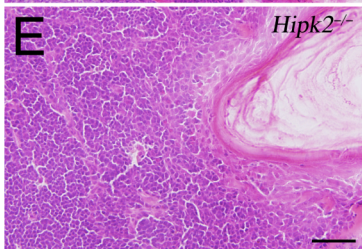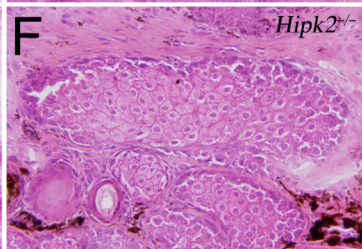

Supplement: pnas_0703213104_7.pdf [file pnas_0703213104_7.pdf]
